# Supplementary material for: Impact of organic molecular structure on the estimation of atmospherically relevant physicochemical parameters
Source: Copernicus journal article supplement (doi:10.5194/acp-21-6541-2021), 2021-04-30
Supplement: Supplementary file 1 [file acp-21-6541-2021-supplement.zip]

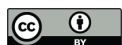

## *Supplement of*

# **Impact of organic molecular structure on the estimation of atmospherically relevant physicochemical parameters**

**Gabriel Isaacman-VanWertz and Bernard Aumont**

*Correspondence to:* Gabriel Isaacman-VanWertz (ivw@vt.edu)

- acp-21-6541-2021-supplement-title-page.pdf
- IVW parameter estimation SI.docx
- PEACH v1.ipf
- Supplementary Data.xlsx

The copyright of individual parts of the supplement might differ from the article licence.
